# Supplementary material
Source: PubMed Central journal article supplement (PMC5075036)
Supplement: JB.00550-16_zjb999094229so1.pdf [file JB.00550-16_zjb999094229so1.pdf]

Supporting information for:

**Interrupting biosynthesis of O-antigen or the lipopolysaccharide core produces morphological defects in *Escherichia coli* by sequestering undecaprenyl phosphate**

Matthew A. Jorgenson and Kevin D. Young\*

Department of Microbiology and Immunology, University of Arkansas for Medical Sciences, Little Rock, AR 72205, USA

\*Corresponding author

E-mail: [kdyoung@uams.edu](mailto:kdyoung@uams.edu)

**Table S1: Strains used in this study**

| <b>Strain</b> | <b>Relevant features</b>                   | <b>Source or reference</b> |
|---------------|--------------------------------------------|----------------------------|
| MAJ1          | MG1655 <i>wbbL::IS5</i>                    | Lab collection             |
| MAJ330        | MG1655 <i>frt wbbL+</i>                    | (1)                        |
| MAJ339        | MAJ330 $\Delta wzxB::kan$                  | This study                 |
| MAJ343        | MAJ330 $\Delta wecA::kan$                  | This study                 |
| MAJ344        | MAJ330 $\Delta wbbK::kan$                  | This study                 |
| MAJ345        | MAJ330 $\Delta waaL::kan$                  | This study                 |
| MAJ346        | MAJ330 $\Delta wbbJ::kan$                  | This study                 |
| MAJ349        | MAJ330 $\Delta wbbI::kan$                  | This study                 |
| MAJ350        | MAJ330 $\Delta wbbH::kan$                  | This study                 |
| MAJ351        | MAJ330 $\Delta wzzB::kan$                  | This study                 |
| MAJ356        | MAJ330 $\Delta wecB::kan$                  | This study                 |
| MAJ368        | MAJ345 $\Delta waaL::frt$                  | This study                 |
| MAJ369        | MAJ343 $\Delta wecA::frt \Delta wzxB::kan$ | This study                 |
| MAJ370        | MAJ343 $\Delta wecA::frt \Delta waaL::kan$ | This study                 |
| MAJ374        | MAJ330 $\Delta waaC::kan$                  | This study                 |
| MAJ375        | MAJ330 $\Delta waaF::kan$                  | This study                 |
| MAJ384        | MAJ343 $\Delta wecA::frt \Delta waaC::kan$ | This study                 |
| MAJ385        | MAJ343 $\Delta wecA::frt \Delta waaF::kan$ | This study                 |
| MAJ397        | MAJ356 $\Delta wecB::frt \Delta wbbK::kan$ | This study                 |
| MAJ398        | MAJ356 $\Delta wecB::frt \Delta wbbJ::kan$ | This study                 |
| MAJ411        | MAJ374 $\Delta waaC::frt$                  | This study                 |
| MAJ427        | MAJ330/pDSW361                             | This study                 |
| MAJ428        | MAJ330/pMAJ41                              | This study                 |
| MAJ429        | MAJ330/pMAJ42                              | This study                 |
| MAJ430        | MAJ330/pMAJ43                              | This study                 |
| MAJ431        | MAJ330/pMAJ44                              | This study                 |
| MAJ432        | MAJ330/pMAJ45                              | This study                 |
| MAJ433        | MAJ368/pDSW361                             | This study                 |
| MAJ434        | MAJ368/pMAJ41                              | This study                 |
| MAJ435        | MAJ368/pMAJ43                              | This study                 |
| MAJ436        | MAJ368/pMAJ44                              | This study                 |
| MAJ437        | MAJ368/pMAJ45                              | This study                 |
| MAJ438        | MAJ411/pDSW361                             | This study                 |
| MAJ439        | MAJ411/pMAJ42                              | This study                 |
| MAJ440        | MAJ411/pMAJ43                              | This study                 |
| MAJ441        | MAJ411/pMAJ44                              | This study                 |
| MAJ442        | MAJ411/pMAJ45                              | This study                 |
| MAJ489        | MAJ339 <i>rmIC::IS5</i>                    | This study                 |
| MAJ490        | MAJ339 <i>wbbL::IS5</i>                    | This study                 |

**Table S2: Plasmids used in this study**

| <b>Plasmid</b> | <b>Relevant features</b>                                                                               | <b>Source or reference</b> |
|----------------|--------------------------------------------------------------------------------------------------------|----------------------------|
| pDSW361        | pDSW361 is a KanR derivative of pDSW204; IPTG regulation ( $P_{204}$ ) <i>lacI<sup>q</sup></i> pBR ori | (2)                        |
| pMAJ41         | pDSW361:: <i>waaL</i>                                                                                  | This study                 |
| pMAJ42         | pDSW361:: <i>waaC</i>                                                                                  | This study                 |
| pMAJ43         | pDSW361:: <i>murA</i>                                                                                  | This study                 |
| pMAJ44         | pDSW361:: <i>wecG</i>                                                                                  | This study                 |
| pMAJ45         | pDSW361:: <i>uppS</i>                                                                                  | This study                 |

**Table S3: Primers used in this study**

| Primer | Sequence <sup>a</sup>                                            | Purpose            |
|--------|------------------------------------------------------------------|--------------------|
| P21    | CAGGAATTCTTGTCTGCTACTCAACCACTTAG                                 | pMAJ45             |
| P23    | ATACTTCTGCTAATAATTTTCTCTGAGAGCATGCATTGTG<br>TGTAGGCTGGAGCTGCTTCG | $\Delta wecA::kan$ |
| P24    | TGTGTCATCACATCCTCATTTATTTGGTTAAATTGGGGCT<br>ATTCCGGGGATCCGTCGACC |                    |
| P27    | CGCAAAGGCGCTCGCCGCTTATTCGAAGAGAATCGATGT<br>GTGTAGGCTGGAGCTGCTTCG | $\Delta wecB::kan$ |
| P28    | ACAGAAATGGTCGCAAACTCATAGTGATATCCGATTATT<br>ATTCCGGGGATCCGTCGACC  |                    |
| P118   | ATAATCGTACATAAAATCCTCAGCAAACCAGTAATTTATTA<br>TTCCGGGGATCCGTCGACC | $\Delta wzxB::kan$ |
| P119   | TTACGTTAGATGAGCTTATCAGATTAATAATTGTCATGT<br>GTAGGCTGGAGCTGCTTCG   |                    |
| P180   | CAAAAATCATAAAGAAATACAATCATGAGACCAAATTATG<br>TGTAGGCTGGAGCTGCTTCG | $\Delta wbbK::kan$ |
| P181   | GATTATTATATATACCATTTCAATGTTCTTCAGTAATAAAA<br>TTCCGGGGATCCGTCGACC |                    |
| P184   | GGAAGTTACTTCAGGGATGTTCTTGAAGAGGTGATCGAT<br>GTGTAGGCTGGAGCTGCTTCG | $\Delta wbbJ::kan$ |
| P185   | TTGACCGCAGAAACAACGACTATGCTTTTTCCATAATTT<br>ATTCCGGGGATCCGTCGACC  |                    |
| P192   | AACTATGCGGACTTGGAATTTCCGTCAGTTAGGGTAAT<br>GTGTAGGCTGGAGCTGCTTCG  | $\Delta wzzB::kan$ |
| P193   | TTCTTTAAACCGAAAAGATTACTTCGCGTTGTAATTGCG<br>ATTCCGGGGATCCGTCGACC  |                    |
| P196   | CTCTTTATCAAGTGAAAAATATAATGAGTACGGATTAATG<br>TGTAGGCTGGAGCTGCTTCG | $\Delta wbbH::kan$ |
| P197   | TCATTCAAAAAATACATTTTCACTTTATTTTCTGGGCCTTA<br>TTCCGGGGATCCGTCGACC |                    |
| P208   | CATGGCCTGGCTGAATCGCGACGCATAAGAGCTCTGCAT<br>GTGTAGGCTGGAGCTGCTTCG | $\Delta waaF::kan$ |
| P209   | CGATCAAAACCCGCATCCGTCAGGCTTCCTCTTGTAACA<br>AATTCCGGGGATCCGTCGACC |                    |
| P212   | ACTCAACGCGCTATTGTTACAAGAGGAAGCCTGACGGAT<br>GTGTAGGCTGGAGCTGCTTCG | $\Delta waaC::kan$ |
| P213   | ATGTTAGCATGTTTTACCTTTATAATGATGATAACTTTTCA<br>TTCCGGGGATCCGTCGACC |                    |
| P229   | CAGGAATTCCTAACATCCTTTAACTTCATTC                                  | pMAJ41             |
| P231   | CAAGAATTCCGGGTTTTGATCGTTAAAAC                                    | pMAJ42             |
| P233   | CAGGAATTCAATAACAACACCACGGCACC                                    | pMAJ44             |
| P251   | TTGCTGCAGTTAATTAATTGTATTGTTACG                                   | pMAJ41             |
| P252   | TTGCTGCAGTTATAATGATGATAACTTTTC                                   | pMAJ42             |
| P253   | TTGCTGCAGTCATAGGTTGCCGGTGTAGTG                                   | pMAJ44             |

|      |                                                                 |                   |
|------|-----------------------------------------------------------------|-------------------|
| P254 | TTGCTGCAGTCAGGCTGTTTCATCACCGGG                                  | pMAJ45            |
| P278 | AGCAGTTTTGGAAAAGTTATCATCATTATAAAGGTAAAC<br>ATTCCGGGGATCCGTCGACC | <i>ΔwaaL::kan</i> |
| P279 | TAACTCACTTCTTAACTTGTTTATTCTTAATTAATTGTATG<br>TAGGCTGGAGCTGCTTCG |                   |

<sup>a</sup>All primer sequences are written 5' → 3'. Restriction sites are underlined.

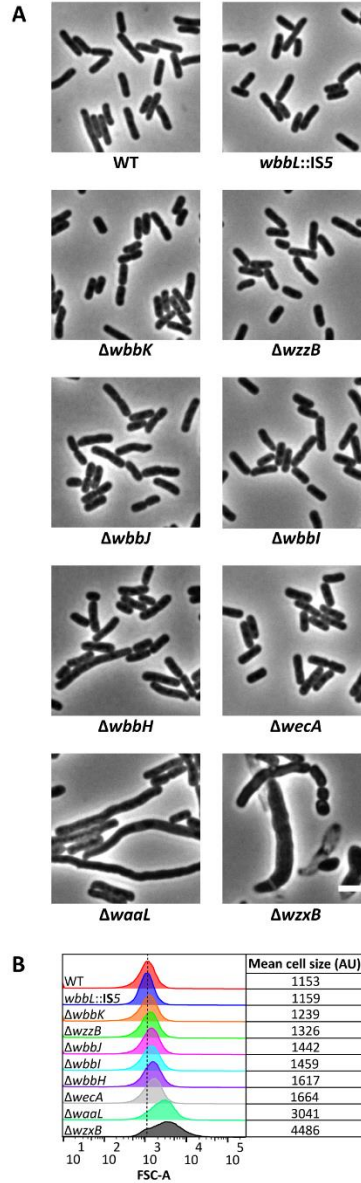

**Figure S1. Disrupting O-antigen biosynthesis induces cell shape defects. (A)**

Micrographs of cells from which the indicated genes were deleted. Cells were grown at 37°C in LB until they reached an  $OD_{600} = 0.5-0.6$ . The cells were then fixed and photographed by phase-contrast microscopy. Micrographs of  $\Delta wzxB$  cells are from overnight cultures because the strain readily develops suppressing mutations that correct the shape defect. The white bar represents 3  $\mu m$ . (B) Flow cytometry data from

live cells in panel A. Histograms of the FSC-A from 100,000 events (cells). The mean cell size of the wild type (red graph) is represented by the vertical dashed line and is expressed in arbitrary units (AU). Data is representative of two independent experiments. Strains: MAJ330 (WT), MAJ1 (*wbbL::IS5*), MAJ344 ( $\Delta wbbK$ ), MAJ351 ( $\Delta wzzB$ ), MAJ346 ( $\Delta wbbJ$ ), MAJ349 ( $\Delta wbbI$ ), MAJ350 ( $\Delta wbbH$ ), MAJ343 ( $\Delta wecA$ ), MAJ345 ( $\Delta waaL$ ) and MAJ339 ( $\Delta wzxB$ ).

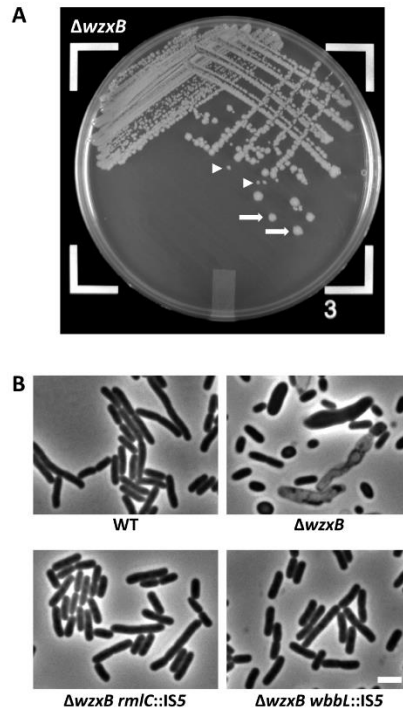

**Figure S2.  $\Delta wzxB$  cells readily acquire suppressor mutations.** (A) Streak plate of  $\Delta wzxB$  cells grown overnight on LB medium at 37°C.  $\Delta wzxB$  cells normally give rise to small colonies (arrowheads), but they readily develop suppressing mutations that result in bigger colonies (arrows). (B) Micrographs of  $\Delta wzxB$  and  $\Delta wzxB$  suppressing cells. Suppressing mutations were mapped to *rmlC* and *wbbL*, whose disruption prevents the formation of O-antigen intermediates. Cells were grown and imaged as described in the legend to Figure S1. Micrographs of  $\Delta wzxB$  cells are from overnight cultures because the strain readily develops suppressor mutations that correct the shape defect. The white bar represent 3  $\mu$ m. Strains: MAJ330 (WT), MAJ339 ( $\Delta wzxB$ ), MAJ489 ( $\Delta wzxB$  *rmlC*::IS5) and MAJ490 ( $\Delta wzxB$  *wbbL*::IS5).

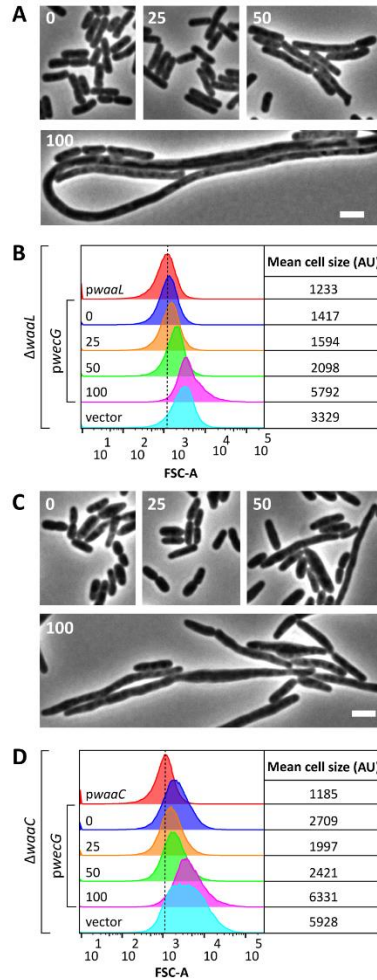

**Figure S3. Overproducing ECA in cells that also accumulate O-antigen**

**intermediates causes filamentation.** (A) Micrographs of  $\Delta waaL$  cells expressing

various amounts of *wecG* in *trans*. Cells were grown at 37°C in LB containing various concentrations ( $\mu$ M) of IPTG (indicated on the micrographs) until the cells reached an  $OD_{600} = 0.5-0.6$ . The cells were then fixed and photographed by phase-contrast microscopy. The white bar represents 3  $\mu$ m.

(B) Flow cytometry data from live cells in panel A. Histograms of the forward scatter area from 100,000 events (cells). The mean cell size of  $\Delta waaL$  cells expressing *waaL* in *trans* (red graph) is represented by the

vertical dashed line and is expressed in arbitrary units (AU). Note that IPTG was added

to 100 uM for  $\Delta waaL$  cells harboring *pwaaL* or the empty vector. Data is representative of two independent experiments. Strains: MAJ434 ( $\Delta waaL/pwaaL$ ), MAJ436 ( $\Delta waaL/pwecG$ ) and MAJ433 ( $\Delta waaL/vector$ ). (C and D). Data for  $\Delta waaC$  cells expressing various amounts of *wecG* *in trans*. The experimental conditions were the same as described in panels A and B. Strains: MAJ439 ( $\Delta waaC/pwaaC$ ), MAJ441 ( $\Delta waaC/pwecG$ ) and MAJ438 ( $\Delta waaC/vector$ ).

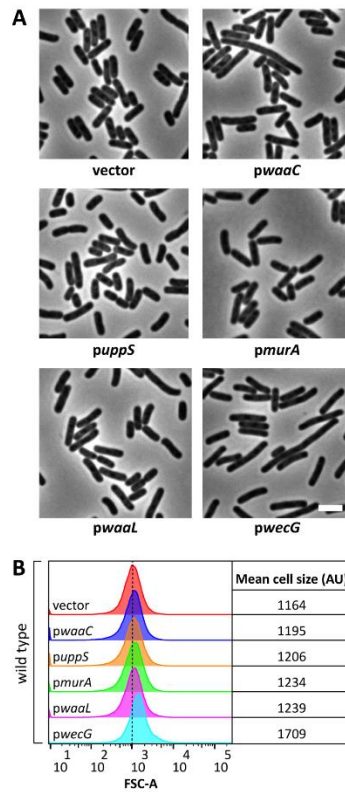

**Figure S4. Overexpressing other genes has little or no effect on cell shape in wild type *E. coli*.** (A) Micrographs of wild type cells containing derivatives of pDSW361 that express the indicated genes. Cells were grown at 37°C in LB containing 100  $\mu$ M IPTG until the cells reached an OD<sub>600</sub> = 0.5-0.6. The cells were then fixed and photographed by phase-contrast microscopy. The white bar represents 3  $\mu$ m. (B) Flow cytometry data from live cells in panel A. Histograms of the forward scatter area from 100,000 events (cells). The mean cell size of the wild type with the empty vector (red graph) is represented by the vertical dashed line and is expressed in arbitrary units (AU). Data is representative of two independent experiments. Strains: MAJ427 (vector), MAJ429 (pwaaC), MAJ432 (puppS), MAJ430 (pmurA), MAJ428 (pwaaL) and MAJ431 (pwecG).

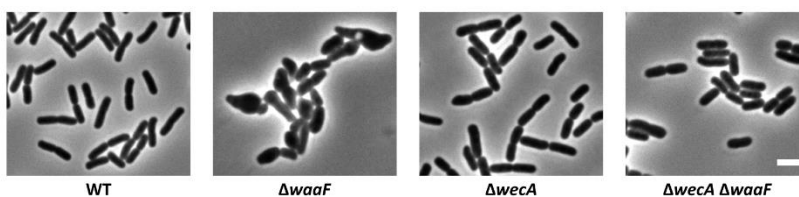

**Figure S5. Morphological defects of LPS core mutants depend on O-antigen biosynthesis.** Micrographs of cells with the indicated genotypes. Cells were grown and imaged as described in the legend to Figure S1. The white bar represents 3  $\mu\text{m}$ . Strain: MAJ330 (WT), MAJ375 ( $\Delta waaF$ ), MAJ343 ( $\Delta wecA$ ) and MAJ385 ( $\Delta wecA \Delta waaF$ ).

### **Supplemental References**

1. **Rendueles O, Beloin C, Latour-Lambert P, Ghigo JM.** 2014. A new biofilm-associated colicin with increased efficiency against biofilm bacteria. *ISME J* **8**:1275-1288.
2. **Weiss DS, Chen JC, Ghigo JM, Boyd D, Beckwith J.** 1999. Localization of FtsI (PBP3) to the septal ring requires its membrane anchor, the Z ring, FtsA, FtsQ, and FtsL. *J Bacteriol* **181**:508-520.
